# Supplementary material for: Genome-Wide Study of NOT2_3_5 Protein Subfamily in Cotton and Their Necessity in Resistance to Verticillium wilt
Source: Int J Mol Sci. 2021 May 26;22(11):5634. doi: 10.3390/ijms22115634 (PMC8198034; doi:10.3390/ijms22115634)
Supplement: Supplementary file 1 [file ijms-22-05634-s001.zip › supplementary tables-XML-FINAL.xlsx]

## Sheet: Tbale S1
Table S1 The detailed information of NOT2_3_5 domain protein family from four cotton species
Gene name	Gene ID	Chr	Chr. location	Transcript		Protein
				ORF length(bp)	Number of exons	Length(aa)	MW/kDa	PI	Subcellular location
GaNOT2_3_5-1	Ga05G1044.1	A05	9025540-9029889(-)	1992	13	663	70554	7.93	Nuclear
GaNOT2_3_5-2	Ga08G0032.1	A08	224582-228860(+)	1995	13	664	70526	7.44	Nuclear
GaNOT2_3_5-3	Ga11G0971.1	A11	16373073-16380028(-)	2658	17	885	97260.3	5.4	Nuclear
GaNOT2_3_5-4	Ga13G1349.1	A13	83457623-83465597(+)	2640	16	879	96391	5.3	Nuclear
GaNOT2_3_5-5	Ga13G2784.1	A13	123421580-123425761(-)	1995	13	664	70729.4	7.14	Nuclear
GrNOT2_3_5-1	Gorai.004G003300.1	D04	208812-213817(+)	1995	10	664	70618.2	7.91	Nuclear
GrNOT2_3_5-2	Gorai.007G287600.1	D07	49414363-49422204(+)	2664	16	887	97201	5.34	Nuclear
GrNOT2_3_5-3	Gorai.009G102700.1	D09	7403448-7409070(-)	1962	15	653	69557.9	7.08	Nuclear
GrNOT2_3_5-4	Gorai.013G123000.1	D13	31606690-31615630(+)	2658	16	885	96849.5	5.34	Nuclear
GrNOT2_3_5-5	Gorai.013G265700.1	D13	57850915-57856636(-)	1995	13	664	70655.3	7.14	Nuclear
GbNOT2_3_5-1	GOBAR_AA12993.1	AD2-A05	9386465-9390669(+)	1995	13	664	70786.4	7.93	Nuclear
GbNOT2_3_5-2	GOBAR_AA23080.1	AD2-A08	323699-328023(+)	1848	13	615	65676.2	8.85	Nuclear
GbNOT2_3_5-3	GOBAR_AA03021.1	AD2-A11	100820723-100828712(+)	2757	16	918	100812	5.29	Nuclear
GbNOT2_3_5-4	GOBAR_AA06293.1	AD2-A13	71316869-71325552(+)	3147	19	1048	115638	5.52	Nuclear
GbNOT2_3_5-5	GOBAR_AA09726.1	AD2-A13	107979453-107983281(-)	2016	14	671	71817.9	7.44	Nuclear
GbNOT2_3_5-6	GOBAR_DD14585.1	AD2-D05	8858345-8862529(-)	1995	13	664	70836.5	7.42	Nuclear
GbNOT2_3_5-7	GOBAR_DD10961.1	AD2-D08	283985-287738(+)	1692	13	563	59019.2	9.45	Nuclear
GbNOT2_3_5-8	GOBAR_DD38202.1	AD2-D11	54646691-54653708(-)	2637	16	878	96063.8	5.35	Nuclear
GbNOT2_3_5-9	GOBAR_DD06366.1	AD2-D13	33366946-33374979(+)	3057	21	1018	112235	5.61	Nuclear
GbNOT2_3_5-10	GOBAR_DD08243.1	AD2-D13	59101499-59105043(-)	1995	12	664	70815.5	7.14	Nuclear
GhNOT2_3_5-1	Gh_A05G0843.1	AD1-A05	8437002-8441330(-)	1878	14	625	66972	7.12	Nuclear
GhNOT2_3_5-2	Gh_A11G2335.1	AD1-A11	80326455-80333410(+)	2667	16	888	97442.4	5.36	Nuclear
GhNOT2_3_5-3	Gh_A13G0871.1	AD1-A13	44936824-44944802(+)	2661	16	886	97229.9	5.31	Nuclear
GhNOT2_3_5-4	Gh_A13G1999.1	AD1-A13	79447188-79451369(-)	1995	13	664	70692.3	6.8	Nuclear
GhNOT2_3_5-5	Gh_D08G0027.1	AD1-D08	244842-254648(+)	1983	13	660	70205.7	7.91	Nuclear
GhNOT2_3_5-6	Gh_D11G2649.1	AD1-D11	55223312-55230345(+)	2667	16	888	97287	5.27	Nuclear
GhNOT2_3_5-7	Gh_D13G1115.1	AD1-D13	32772629-32780665(+)	2658	16	885	96849.5	5.34	Nuclear
GhNOT2_3_5-8	Gh_D13G2398.1	AD1-D13	60039468-60043012(-)	1995	12	664	70815.5	7.14	Nuclear
GhNOT2_3_5-9	Gh_A08G2536.1	scaffold2272_A08	23404-33439(+)	1983	13	660	70156.6	7.91	Nuclear
GhNOT2_3_5-10	Gh_D05G3893.1	scaffold4075_D05	79304-84046(+)	1944	13	647	69768.3	7.42	Nuclear

## Sheet: Table S2
Table S2 The top ten conserved motifs and the functional searches on InterProScan database.
Motifs	AAs	Sequences	InterPro domain
Motif 1	29	DEAQLYAANELYNRGWFYHKEYRTWFQRV	IPR040168
Motif 2	50	GYBQLIQZYZQHQBSSZFRJZQLSAVNQSFREPGLKSLZAAQSNHDPFGL	IPR040168
Motif 3	41	SQSHVQAVNNLSSMGMLNDVNSNDNSPFDINNDFPQLTSRP	IPR040168
Motif 4	21	VEPLVKTBTYERGSYHYFDPH	none
Motif 5	41	AKGDPEFTVPQCYYAKQPPALHQGYFSKFTVDALFYIFYSM	IPR040168
Motif 6	41	QEFSIQNEDFPALPGFKGGNADYAMDLHQKEQLHDNTMSMM	IPR040168
Motif 7	41	KMTEPDLTSLALGIDLTTLGLNJNSSENLHKTFGSPWSDZP	IPR040168
Motif 8	41	HNIHGSFNIPNVPGTLASRNSTLSNVPTGGVQQPTGSLSGG	none
Motif 9	50	NAVPGLGVSPILGNAGPRITSSMGNMVGGGNIGRSLSSGGGLSVPGLASR	IPR040168
Motif 10	50	LSHGSSHGHSGVTNRGGISIVGNPGFSSNTNGVGGSIPGILPTSAAIGNR	IPR040168

## Sheet: Table S3
Table S3 The details information for the Ka/Ks ratio of duplicated genes pairs of NOT2_3_5 domain proteins
Seq_1	Seq_2	Ka	Ks	Ka_Ks
GaNOT2_3_5-1	GhNOT2_3_5-1	0.001396	0.006842	0.203976
GaNOT2_3_5-1	GhNOT2_3_5-4	0.052803	0.36834	0.143353
GaNOT2_3_5-1	GrNOT2_3_5-1	0.046221	0.343238	0.134661
GaNOT2_3_5-1	GaNOT2_3_5-2	0.04763	0.32327	0.147337
GaNOT2_3_5-1	GrNOT2_3_5-3	0.003686	0.027496	0.134039
GaNOT2_3_5-1	GaNOT2_3_5-5	0.051413	0.364281	0.141135
GaNOT2_3_5-1	GrNOT2_3_5-5	0.051424	0.377906	0.136077
GaNOT2_3_5-1	GhNOT2_3_5-8	0.057254	0.380816	0.150345
GaNOT2_3_5-1	GhNOT2_3_5-10	0.008807	0.031455	0.279974
GaNOT2_3_5-2	GhNOT2_3_5-1	0.047515	0.337534	0.140771
GaNOT2_3_5-2	GhNOT2_3_5-4	0.042927	0.381348	0.112566
GaNOT2_3_5-2	GrNOT2_3_5-1	0.005285	0.039054	0.135329
GaNOT2_3_5-2	GrNOT2_3_5-5	0.042953	0.391036	0.109845
GaNOT2_3_5-2	GaNOT2_3_5-5	0.041553	0.37721	0.110159
GaNOT2_3_5-2	GhNOT2_3_5-8	0.048477	0.395197	0.122665
GaNOT2_3_5-2	GhNOT2_3_5-9	0.002654	0.006406	0.414361
GaNOT2_3_5-3	GhNOT2_3_5-2	0.004403	0.004977	0.884712
GaNOT2_3_5-3	GhNOT2_3_5-3	0.069973	0.33887	0.20649
GaNOT2_3_5-3	GrNOT2_3_5-2	0.013793	0.046142	0.298935
GaNOT2_3_5-3	GaNOT2_3_5-4	0.070258	0.341635	0.205652
GaNOT2_3_5-3	GrNOT2_3_5-4	0.066348	0.330428	0.200794
GaNOT2_3_5-3	GhNOT2_3_5-6	0.013772	0.028728	0.479396
GaNOT2_3_5-3	GhNOT2_3_5-7	0.067416	0.335729	0.200806
GaNOT2_3_5-4	GhNOT2_3_5-2	0.068384	0.342828	0.199471
GaNOT2_3_5-4	GhNOT2_3_5-3	0.001473	0.003348	0.440006
GaNOT2_3_5-4	GrNOT2_3_5-2	0.067466	0.343115	0.196626
GaNOT2_3_5-4	GrNOT2_3_5-4	0.004442	0.027195	0.163358
GaNOT2_3_5-4	GhNOT2_3_5-6	0.067526	0.342536	0.197137
GaNOT2_3_5-4	GhNOT2_3_5-7	0.003453	0.027202	0.126926
GaNOT2_3_5-5	GhNOT2_3_5-1	0.053005	0.378858	0.139906
GaNOT2_3_5-5	GhNOT2_3_5-4	0.002628	0.006446	0.407744
GaNOT2_3_5-5	GrNOT2_3_5-1	0.038775	0.380908	0.101796
GaNOT2_3_5-5	GrNOT2_3_5-5	0.006592	0.083482	0.078963
GaNOT2_3_5-5	GhNOT2_3_5-8	0.01185	0.086121	0.137599
GbNOT2_3_5-1	GhNOT2_3_5-1	0.007355	0.012593	0.584052
GbNOT2_3_5-1	GhNOT2_3_5-4	0.058824	0.363215	0.161952
GbNOT2_3_5-1	GaNOT2_3_5-1	0.008282	0.011759	0.704361
GbNOT2_3_5-1	GrNOT2_3_5-3	0.009417	0.03087	0.305045
GbNOT2_3_5-1	GaNOT2_3_5-5	0.057425	0.359188	0.159873
GbNOT2_3_5-1	GbNOT2_3_5-6	0.004286	0.024813	0.172737
GbNOT2_3_5-1	GbNOT2_3_5-7	0.058635	0.324421	0.180739
GbNOT2_3_5-1	GhNOT2_3_5-8	0.054336	0.368087	0.147618
GbNOT2_3_5-1	GhNOT2_3_5-10	0.010327	0.037887	0.272572
GbNOT2_3_5-10	GhNOT2_3_5-1	0.059198	0.400796	0.147702
GbNOT2_3_5-10	GhNOT2_3_5-4	0.01318	0.083839	0.157201
GbNOT2_3_5-10	GrNOT2_3_5-1	0.045672	0.39899	0.114469
GbNOT2_3_5-10	GaNOT2_3_5-1	0.057254	0.387925	0.147589
GbNOT2_3_5-10	GaNOT2_3_5-2	0.048477	0.402428	0.120461
GbNOT2_3_5-10	GaNOT2_3_5-5	0.01185	0.090929	0.130323
GbNOT2_3_5-10	GrNOT2_3_5-5	0.006537	0.015276	0.427927
GbNOT2_3_5-10	GbNOT2_3_5-6	0.054685	0.380548	0.1437
GbNOT2_3_5-10	GbNOT2_3_5-7	0.047553	0.403131	0.11796
GbNOT2_3_5-2	GhNOT2_3_5-4	0.045199	0.373322	0.121074
GbNOT2_3_5-2	GrNOT2_3_5-1	0.006566	0.04068	0.161411
GbNOT2_3_5-2	GaNOT2_3_5-2	0.002183	0.009371	0.2329
GbNOT2_3_5-2	GaNOT2_3_5-5	0.04368	0.368826	0.11843
GbNOT2_3_5-2	GrNOT2_3_5-5	0.043669	0.380781	0.114683
GbNOT2_3_5-2	GbNOT2_3_5-7	0.006139	0.028453	0.215777
GbNOT2_3_5-2	GhNOT2_3_5-8	0.048995	0.38923	0.125877
GbNOT2_3_5-2	GbNOT2_3_5-10	0.048995	0.38923	0.125877
GbNOT2_3_5-2	GhNOT2_3_5-9	0.003666	0.007064	0.518896
GbNOT2_3_5-3	GhNOT2_3_5-2	0.002438	0.004963	0.491183
GbNOT2_3_5-3	GhNOT2_3_5-3	0.069013	0.338989	0.203584
GbNOT2_3_5-3	GbNOT2_3_5-4	0.070801	0.339147	0.208761
GbNOT2_3_5-3	GrNOT2_3_5-2	0.011782	0.046011	0.256075
GbNOT2_3_5-3	GaNOT2_3_5-3	0.006861	0.004974	1.37946
GbNOT2_3_5-3	GaNOT2_3_5-4	0.069289	0.341748	0.202749
GbNOT2_3_5-3	GrNOT2_3_5-4	0.068544	0.33763	0.203014
GbNOT2_3_5-3	GhNOT2_3_5-6	0.011764	0.028647	0.410652
GbNOT2_3_5-3	GbNOT2_3_5-8	0.012886	0.03416	0.377225
GbNOT2_3_5-3	GhNOT2_3_5-7	0.069612	0.342961	0.202973
GbNOT2_3_5-4	GhNOT2_3_5-2	0.070436	0.340213	0.207036
GbNOT2_3_5-4	GhNOT2_3_5-3	0.002439	0.003317	0.735246
GbNOT2_3_5-4	GrNOT2_3_5-2	0.069526	0.340492	0.204194
GbNOT2_3_5-4	GaNOT2_3_5-3	0.072303	0.339028	0.213267
GbNOT2_3_5-4	GaNOT2_3_5-4	0.001965	0	#NAME?
GbNOT2_3_5-4	GrNOT2_3_5-4	0.005885	0.030371	0.193755
GbNOT2_3_5-4	GhNOT2_3_5-6	0.069574	0.342716	0.203008
GbNOT2_3_5-4	GbNOT2_3_5-8	0.071228	0.346202	0.205741
GbNOT2_3_5-4	GhNOT2_3_5-7	0.0049	0.028659	0.170981
GbNOT2_3_5-4	GbNOT2_3_5-9	0.028963	0.052259	0.554222
GbNOT2_3_5-5	GhNOT2_3_5-1	0.063513	0.392676	0.161744
GbNOT2_3_5-5	GbNOT2_3_5-1	0.062456	0.359342	0.173807
GbNOT2_3_5-5	GbNOT2_3_5-2	0.053958	0.395288	0.136504
GbNOT2_3_5-5	GhNOT2_3_5-4	0.009965	0.014306	0.696595
GbNOT2_3_5-5	GrNOT2_3_5-1	0.047813	0.401863	0.118977
GbNOT2_3_5-5	GaNOT2_3_5-1	0.061984	0.376434	0.16466
GbNOT2_3_5-5	GaNOT2_3_5-2	0.050725	0.401669	0.126285
GbNOT2_3_5-5	GaNOT2_3_5-5	0.009969	0.021061	0.473344
GbNOT2_3_5-5	GrNOT2_3_5-5	0.015498	0.089837	0.172517
GbNOT2_3_5-5	GbNOT2_3_5-6	0.061342	0.368445	0.166488
GbNOT2_3_5-5	GbNOT2_3_5-7	0.047316	0.394722	0.119872
GbNOT2_3_5-5	GhNOT2_3_5-8	0.015669	0.079398	0.197348
GbNOT2_3_5-5	GbNOT2_3_5-10	0.015669	0.084317	0.185835
GbNOT2_3_5-6	GhNOT2_3_5-1	0.010528	0.03487	0.301933
GbNOT2_3_5-6	GhNOT2_3_5-4	0.05775	0.375601	0.153754
GbNOT2_3_5-6	GrNOT2_3_5-1	0.051136	0.356994	0.14324
GbNOT2_3_5-6	GaNOT2_3_5-1	0.011285	0.032525	0.346968
GbNOT2_3_5-6	GaNOT2_3_5-2	0.05397	0.350043	0.15418
GbNOT2_3_5-6	GrNOT2_3_5-3	0.007051	0.016385	0.430303
GbNOT2_3_5-6	GaNOT2_3_5-5	0.056353	0.371491	0.151695
GbNOT2_3_5-6	GrNOT2_3_5-5	0.057787	0.374651	0.154241
GbNOT2_3_5-6	GhNOT2_3_5-8	0.054685	0.373499	0.146412
GbNOT2_3_5-6	GhNOT2_3_5-10	0.00716	0.013193	0.542722
GbNOT2_3_5-7	GhNOT2_3_5-1	0.051656	0.330924	0.156095
GbNOT2_3_5-7	GhNOT2_3_5-4	0.041019	0.374188	0.109621
GbNOT2_3_5-7	GrNOT2_3_5-1	0.002334	0.015082	0.154774
GbNOT2_3_5-7	GaNOT2_3_5-1	0.050703	0.318259	0.159314
GbNOT2_3_5-7	GaNOT2_3_5-2	0.004677	0.025298	0.184862
GbNOT2_3_5-7	GaNOT2_3_5-5	0.039402	0.37348	0.105499
GbNOT2_3_5-7	GrNOT2_3_5-5	0.041049	0.381349	0.107641
GbNOT2_3_5-7	GbNOT2_3_5-6	0.057367	0.334276	0.171615
GbNOT2_3_5-7	GhNOT2_3_5-8	0.047553	0.39461	0.120508
GbNOT2_3_5-7	GhNOT2_3_5-9	0.007076	0.028076	0.252042
GbNOT2_3_5-7	GhNOT2_3_5-10	0.054203	0.348469	0.155545
GbNOT2_3_5-8	GaNOT2_3_5-4	0.069169	0.346057	0.199876
GbNOT2_3_5-8	GrNOT2_3_5-4	0.067326	0.34199	0.196865
GbNOT2_3_5-8	GhNOT2_3_5-7	0.068402	0.347424	0.196885
GbNOT2_3_5-9	GhNOT2_3_5-3	0.006384	0.023541	0.271197
GbNOT2_3_5-9	GrNOT2_3_5-4	0.000978	0.009959	0.098246
GbNOT2_3_5-9	GaNOT2_3_5-4	0.00544	0.025495	0.213359
GbNOT2_3_5-9	GhNOT2_3_5-6	0.074998	0.349457	0.214614
GbNOT2_3_5-9	GbNOT2_3_5-8	0.068308	0.336597	0.202937
GhNOT2_3_5-1	GhNOT2_3_5-4	0.054478	0.383309	0.142124
GhNOT2_3_5-1	GrNOT2_3_5-1	0.044543	0.359331	0.12396
GhNOT2_3_5-1	GrNOT2_3_5-3	0.002481	0.029508	0.084082
GhNOT2_3_5-1	GrNOT2_3_5-5	0.053017	0.389887	0.135981
GhNOT2_3_5-1	GhNOT2_3_5-8	0.059198	0.393059	0.150609
GhNOT2_3_5-1	GhNOT2_3_5-10	0.007391	0.033838	0.218408
GhNOT2_3_5-10	GrNOT2_3_5-3	0.004279	0.009366	0.45685
GhNOT2_3_5-2	GhNOT2_3_5-3	0.068115	0.340056	0.200306
GhNOT2_3_5-2	GrNOT2_3_5-2	0.011271	0.044256	0.25468
GhNOT2_3_5-2	GrNOT2_3_5-4	0.064508	0.331628	0.194519
GhNOT2_3_5-2	GhNOT2_3_5-6	0.011254	0.026931	0.417861
GhNOT2_3_5-2	GhNOT2_3_5-7	0.06557	0.33692	0.194616
GhNOT2_3_5-3	GrNOT2_3_5-2	0.066936	0.341645	0.195923
GhNOT2_3_5-3	GrNOT2_3_5-4	0.005392	0.026935	0.200199
GhNOT2_3_5-3	GhNOT2_3_5-6	0.067256	0.342563	0.196331
GhNOT2_3_5-3	GhNOT2_3_5-7	0.004409	0.02523	0.17474
GhNOT2_3_5-4	GrNOT2_3_5-1	0.040144	0.385073	0.104252
GhNOT2_3_5-4	GrNOT2_3_5-5	0.007914	0.076456	0.103514
GhNOT2_3_5-4	GhNOT2_3_5-8	0.01318	0.07907	0.166682
GhNOT2_3_5-5	GrNOT2_3_5-1	0.003985	0.012862	0.309857
GhNOT2_3_5-6	GrNOT2_3_5-2	0.002922	0.020158	0.144935
GhNOT2_3_5-6	GrNOT2_3_5-4	0.063654	0.33408	0.190535
GhNOT2_3_5-6	GhNOT2_3_5-7	0.064714	0.339404	0.190669
GhNOT2_3_5-7	GrNOT2_3_5-2	0.064657	0.337192	0.191752
GhNOT2_3_5-7	GrNOT2_3_5-4	0.000977	0.008283	0.117979
GhNOT2_3_5-8	GrNOT2_3_5-1	0.045672	0.391789	0.116573
GhNOT2_3_5-8	GrNOT2_3_5-5	0.006537	0.015276	0.427927
GhNOT2_3_5-9	GrNOT2_3_5-1	0.006653	0.041541	0.160148
GhNOT2_3_5-9	GhNOT2_3_5-5	0.003985	0.032578	0.122332
GhNOT2_3_5-9	GhNOT2_3_5-8	0.044619	0.387137	0.115254
GrNOT2_3_5-1	GrNOT2_3_5-5	0.040169	0.380557	0.105554

## Sheet: Table S4
Table S4 Cis-elements from 10 putative GhNOT2_3_5 promoter regions.
Gene	type	sequence	location	length		description
GhNOT2_3_5-1	WUN-motif	AAATTTCCT	2043	9	+	wound-responsive element
GhNOT2_3_5-1	P-box	CCTTTTG	2085	7	-	gibberellin-responsive element
GhNOT2_3_5-1	ATCT-motif	AATCTAATCC	1877	9	-	part of a conserved DNA module involved in light responsiveness
GhNOT2_3_5-1	MRE	AACCTAA	619	7	+	MYB binding site involved in light responsiveness
GhNOT2_3_5-1	MBSI	aaaAaaC(G/C)GTTA	765	10.5	-	MYB binding site involved in flavonoid biosynthetic genes regulation
GhNOT2_3_5-1	TCA-element	CCATCTTTTT	667	9	+	cis-acting element involved in salicylic acid responsiveness
GhNOT2_3_5-1	ARE	AAACCA	1934	6	-	cis-acting regulatory element essential for the anaerobic induction
GhNOT2_3_5-1	ARE	AAACCA	2174	6	-	cis-acting regulatory element essential for the anaerobic induction
GhNOT2_3_5-1	CAT-box	GCCACT	1614	6	+	cis-acting regulatory element related to meristem expression
GhNOT2_3_5-1	TCT-motif	TCTTAC	1523	6	+	part of a light responsive element
GhNOT2_3_5-1	TCT-motif	TCTTAC	2388	6	+	part of a light responsive element
GhNOT2_3_5-1	MBS	CAACTG	1262	6	+	MYB binding site involved in drought-inducibility
GhNOT2_3_5-9	MBS	CAACTG	526	6	-	MYB binding site involved in drought-inducibility
GhNOT2_3_5-9	chs-CMA1a	TTACTTAA	160	8	-	part of a light responsive element
GhNOT2_3_5-9	GT1-motif	GGTTAAT	2388	7	+	light responsive element
GhNOT2_3_5-9	ARE	AAACCA	73	6	-	cis-acting regulatory element essential for the anaerobic induction
GhNOT2_3_5-9	ARE	AAACCA	323	6	-	cis-acting regulatory element essential for the anaerobic induction
GhNOT2_3_5-9	ARE	AAACCA	329	6	-	cis-acting regulatory element essential for the anaerobic induction
GhNOT2_3_5-9	TGA-element	AACGAC	1678	6	-	auxin-responsive element
GhNOT2_3_5-9	ABRE	ACGTG	946	5	-	cis-acting element involved in the abscisic acid responsiveness
GhNOT2_3_5-9	ABRE	ACGTG	1165	5	+	cis-acting element involved in the abscisic acid responsiveness
GhNOT2_3_5-9	ABRE	ACGTG	1251	5	+	cis-acting element involved in the abscisic acid responsiveness
GhNOT2_3_5-9	TC-rich repeats	ATTCTCTAAC	81	9	-	cis-acting element involved in defense and stress responsiveness
GhNOT2_3_5-9	Box 4	ATTAAT	675	6	+	part of a conserved DNA module involved in light responsiveness
GhNOT2_3_5-9	Box 4	ATTAAT	836	6	+	part of a conserved DNA module involved in light responsiveness
GhNOT2_3_5-9	Box 4	ATTAAT	2376	6	-	part of a conserved DNA module involved in light responsiveness
GhNOT2_3_5-9	G-box	TACGTG	1164	6	+	cis-acting regulatory element involved in light responsiveness
GhNOT2_3_5-9	G-box	TACGTG	1250	6	+	cis-acting regulatory element involved in light responsiveness
GhNOT2_3_5-9	AT1-motif	AATTATTTTTTATT	166	13	-	part of a light responsive module
GhNOT2_3_5-9	AT1-motif	AATTATTTTTTATT	1772	13	-	part of a light responsive module
GhNOT2_3_5-9	GATA-motif	GATAGGG	34	7	-	part of a light responsive element
GhNOT2_3_5-9	G-Box	CACGTT	946	6	+	cis-acting regulatory element involved in light responsiveness
GhNOT2_3_5-2	P-box	CCTTTTG	252	7	+	gibberellin-responsive element
GhNOT2_3_5-2	P-box	CCTTTTG	708	7	+	gibberellin-responsive element
GhNOT2_3_5-2	LTR	CCGAAA	1508	6	+	cis-acting element involved in low-temperature responsiveness
GhNOT2_3_5-2	Box 4	ATTAAT	538	6	+	part of a conserved DNA module involved in light responsiveness
GhNOT2_3_5-2	Box 4	ATTAAT	545	6	+	part of a conserved DNA module involved in light responsiveness
GhNOT2_3_5-2	Box 4	ATTAAT	1908	6	-	part of a conserved DNA module involved in light responsiveness
GhNOT2_3_5-2	Box 4	ATTAAT	1982	6	-	part of a conserved DNA module involved in light responsiveness
GhNOT2_3_5-2	Box 4	ATTAAT	2316	6	-	part of a conserved DNA module involved in light responsiveness
GhNOT2_3_5-2	circadian	CAAAGATATC	1132	9	+	cis-acting regulatory element involved in circadian control
GhNOT2_3_5-2	GT1-motif	GGTTAAT	2090	7	+	light responsive element
GhNOT2_3_5-2	TCT-motif	TCTTAC	279	6	-	part of a light responsive element
GhNOT2_3_5-2	TCT-motif	TCTTAC	324	6	-	part of a light responsive element
GhNOT2_3_5-2	TCT-motif	TCTTAC	530	6	-	part of a light responsive element
GhNOT2_3_5-2	HD-Zip 1	CAAT(A/T)ATTG	2420	8	-	element involved in differentiation of the palisade mesophyll cells
GhNOT2_3_5-2	MBS	CAACTG	481	6	+	MYB binding site involved in drought-inducibility
GhNOT2_3_5-2	O2-site	GATGATGTGG	174	9	-	cis-acting regulatory element involved in zein metabolism regulation
GhNOT2_3_5-3	ATC-motif	AGTAATCT	2062	8	-	part of a conserved DNA module involved in light responsiveness
GhNOT2_3_5-3	CAT-box	GCCACT	189	6	+	cis-acting regulatory element related to meristem expression
GhNOT2_3_5-3	GT1-motif	GGTTAAT	367	7	-	light responsive element
GhNOT2_3_5-3	GT1-motif	GGTTAA	368	6	-	light responsive element
GhNOT2_3_5-3	GT1-motif	GGTTAA	789	6	+	light responsive element
GhNOT2_3_5-3	TCT-motif	TCTTAC	1852	6	-	part of a light responsive element
GhNOT2_3_5-3	TCT-motif	TCTTAC	2092	6	+	part of a light responsive element
GhNOT2_3_5-3	ARE	AAACCA	551	6	-	cis-acting regulatory element essential for the anaerobic induction
GhNOT2_3_5-3	I-box	GATAAGGGT	1058	9	+	part of a light responsive element
GhNOT2_3_5-3	MRE	AACCTAA	279	7	-	MYB binding site involved in light responsiveness
GhNOT2_3_5-3	MRE	AACCTAA	370	7	+	MYB binding site involved in light responsiveness
GhNOT2_3_5-3	ABRE	CGTACGTGCA	520	9	+	cis-acting element involved in the abscisic acid responsiveness
GhNOT2_3_5-3	ABRE	ACGTG	1784	5	-	cis-acting element involved in the abscisic acid responsiveness
GhNOT2_3_5-3	Box 4	ATTAAT	274	6	+	part of a conserved DNA module involved in light responsiveness
GhNOT2_3_5-3	Box 4	ATTAAT	400	6	+	part of a conserved DNA module involved in light responsiveness
GhNOT2_3_5-3	Box 4	ATTAAT	1484	6	-	part of a conserved DNA module involved in light responsiveness
GhNOT2_3_5-3	Box 4	ATTAAT	1812	6	-	part of a conserved DNA module involved in light responsiveness
GhNOT2_3_5-3	Box 4	ATTAAT	1898	6	-	part of a conserved DNA module involved in light responsiveness
GhNOT2_3_5-3	Box 4	ATTAAT	1902	6	-	part of a conserved DNA module involved in light responsiveness
GhNOT2_3_5-3	TCA-element	CCATCTTTTT	816	10	-	cis-acting element involved in salicylic acid responsiveness
GhNOT2_3_5-3	TCA-element	CCATCTTTTT	1201	10	-	cis-acting element involved in salicylic acid responsiveness
GhNOT2_3_5-3	circadian	CAAAGATATC	2346	10	+	cis-acting regulatory element involved in circadian control
GhNOT2_3_5-3	chs-CMA2a	TCACTTGA	2361	8	+	part of a light responsive element
GhNOT2_3_5-3	GATA-motif	AAGGATAAGG	1362	9	+	part of a light responsive element
GhNOT2_3_5-3	GATA-motif	AAGGATAAGG	1455	9	-	part of a light responsive element
GhNOT2_3_5-3	LTR	CCGAAA	666	6	+	cis-acting element involved in low-temperature responsiveness
GhNOT2_3_5-3	TCCC-motif	TCTCCCT	1165	7	-	part of a light responsive element
GhNOT2_3_5-3	P-box	CAACAAACCCCTT	841	12	+	gibberellin-responsive element and part of a light responsive element
GhNOT2_3_5-3	G-box	CCACGTAA	1783	8	+	cis-acting regulatory element involved in light responsiveness
GhNOT2_3_5-3	G-box	TACGTG	1784	6	-	cis-acting regulatory element involved in light responsiveness
GhNOT2_3_5-4	O2-site	GTTGACGTGA	965	9	+	cis-acting regulatory element involved in zein metabolism regulation	metabolism
GhNOT2_3_5-4	MBS	CAACTG	1967	6	+	MYB binding site involved in drought-inducibility
GhNOT2_3_5-4	GT1-motif	GGTTAAT	141	7	+	light responsive element
GhNOT2_3_5-4	GT1-motif	GTGTGTGAA	1824	9	+	light responsive element
GhNOT2_3_5-4	I-box	cCATATCCAAT	2360	10	-	part of a light responsive element
GhNOT2_3_5-4	ARE	AAACCA	2368	6	-	cis-acting regulatory element essential for the anaerobic induction
GhNOT2_3_5-4	TCA-element	CCATCTTTTT	1082	9	+	cis-acting element involved in salicylic acid responsiveness
GhNOT2_3_5-4	TCA-element	CCATCTTTTT	2383	9	+	cis-acting element involved in salicylic acid responsiveness
GhNOT2_3_5-4	ABRE	ACGTG	2205	5	-	cis-acting element involved in the abscisic acid responsiveness
GhNOT2_3_5-4	ABRE	ACGTG	2293	5	+	cis-acting element involved in the abscisic acid responsiveness
GhNOT2_3_5-4	Box 4	ATTAAT	443	6	+	part of a conserved DNA module involved in light responsiveness
GhNOT2_3_5-4	Box 4	ATTAAT	1063	6	+	part of a conserved DNA module involved in light responsiveness
GhNOT2_3_5-4	Box 4	ATTAAT	2000	6	-	part of a conserved DNA module involved in light responsiveness
GhNOT2_3_5-4	TC-rich repeats	ATTCTCTAAC	177	9	-	cis-acting element involved in defense and stress responsiveness
GhNOT2_3_5-4	G-box	TAACACGTAG	2202	9	+	cis-acting regulatory element involved in light responsiveness
GhNOT2_3_5-4	CGTCA-motif	CGTCA	891	5	+	cis-acting regulatory element involved in the MeJA-responsiveness
GhNOT2_3_5-4	Box II	ACACGTTGT	2204	9	+	part of a light responsive element
GhNOT2_3_5-4	G-Box	CACGTT	2205	6	+	cis-acting regulatory element involved in light responsiveness
GhNOT2_3_5-4	G-Box	CACGTT	2292	6	-	cis-acting regulatory element involved in light responsiveness
GhNOT2_3_5-4	TGACG-motif	TGACG	891	5	-	cis-acting regulatory element involved in the MeJA-responsiveness
GhNOT2_3_5-8	TCT-motif	TCTTAC	1919	6	+	part of a light responsive element
GhNOT2_3_5-10	MBS	CAACTG	1659	6	+	MYB binding site involved in drought-inducibility
GhNOT2_3_5-10	AuxRR-core	GGTCCAT	742	7	-	cis-acting regulatory element involved in auxin responsiveness
GhNOT2_3_5-10	AuxRR-core	GGTCCAT	1986	7	-	cis-acting regulatory element involved in auxin responsiveness
GhNOT2_3_5-10	ARE	AAACCA	1166	6	-	cis-acting regulatory element essential for the anaerobic induction
GhNOT2_3_5-10	ARE	AAACCA	1537	6	+	cis-acting regulatory element essential for the anaerobic induction
GhNOT2_3_5-10	ARE	AAACCA	1890	6	-	cis-acting regulatory element essential for the anaerobic induction
GhNOT2_3_5-10	ARE	AAACCA	2359	6	-	cis-acting regulatory element essential for the anaerobic induction
GhNOT2_3_5-10	ATCT-motif	AATCTAATCC	2302	9	-	part of a conserved DNA module involved in light responsiveness
GhNOT2_3_5-10	TC-rich repeats	GTTTTCTTAC	1090	9	-	cis-acting element involved in defense and stress responsiveness
GhNOT2_3_5-10	TC-rich repeats	GTTTTCTTAC	1870	9	+	cis-acting element involved in defense and stress responsiveness
GhNOT2_3_5-10	Box 4	ATTAAT	1492	6	-	part of a conserved DNA module involved in light responsiveness
GhNOT2_3_5-10	ABRE	ACGTG	492	5	+	cis-acting element involved in the abscisic acid responsiveness
GhNOT2_3_5-10	ABRE	TACGGTC	1989	7	-	cis-acting element involved in the abscisic acid responsiveness
GhNOT2_3_5-10	MRE	AACCTAA	2401	7	-	MYB binding site involved in light responsiveness
GhNOT2_3_5-10	WUN-motif	AAATTTCCT	2468	9	+	wound-responsive element
GhNOT2_3_5-10	Box II	ACACGTAGA	489	9	-	part of a light responsive element
GhNOT2_3_5-10	G-box	CACGAC	336	6	-	cis-acting regulatory element involved in light responsiveness
GhNOT2_3_5-10	G-box	TACGTG	491	6	+	cis-acting regulatory element involved in light responsiveness
GhNOT2_3_5-5	TC-rich repeats	GTTTTCTTAC	319	9	+	cis-acting element involved in defense and stress responsiveness
GhNOT2_3_5-5	Box 4	ATTAAT	371	6	+	part of a conserved DNA module involved in light responsiveness
GhNOT2_3_5-5	Box 4	ATTAAT	661	6	+	part of a conserved DNA module involved in light responsiveness
GhNOT2_3_5-5	Box 4	ATTAAT	862	6	+	part of a conserved DNA module involved in light responsiveness
GhNOT2_3_5-5	ABRE	ACGTG	972	5	-	cis-acting element involved in the abscisic acid responsiveness
GhNOT2_3_5-5	ABRE	ACGTG	1190	5	+	cis-acting element involved in the abscisic acid responsiveness
GhNOT2_3_5-5	ABRE	ACGTG	1277	5	+	cis-acting element involved in the abscisic acid responsiveness
GhNOT2_3_5-5	ABRE	GCAACGTGTC	1461	9	-	cis-acting element involved in the abscisic acid responsiveness
GhNOT2_3_5-5	ABRE	ACGTG	1463	5	-	cis-acting element involved in the abscisic acid responsiveness
GhNOT2_3_5-5	ABRE	ACGTG	2028	5	-	cis-acting element involved in the abscisic acid responsiveness
GhNOT2_3_5-5	TGACG-motif	TGACG	1703	5	-	cis-acting regulatory element involved in the MeJA-responsiveness
GhNOT2_3_5-5	GATA-motif	GATAGGG	21	7	-	part of a light responsive element
GhNOT2_3_5-5	AT1-motif	AATTATTTTTTATT	153	13	-	part of a light responsive module
GhNOT2_3_5-5	GT1-motif	GGTTAAT	644	7	-	light responsive element
GhNOT2_3_5-5	GT1-motif	GGTTAA	645	6	-	light responsive element
GhNOT2_3_5-5	GT1-motif	GGTTAAT	2388	7	+	light responsive element
GhNOT2_3_5-5	TCT-motif	TCTTAC	323	6	+	part of a light responsive element
GhNOT2_3_5-5	TCT-motif	TCTTAC	1888	6	-	part of a light responsive element
GhNOT2_3_5-5	chs-CMA1a	TTACTTAA	147	8	-	part of a light responsive element
GhNOT2_3_5-5	chs-CMA1a	TTACTTAA	580	8	+	part of a light responsive element
GhNOT2_3_5-5	MBS	CAACTG	2077	6	+	MYB binding site involved in drought-inducibility
GhNOT2_3_5-8	MBS	CAACTG	2010	6	+	MYB binding site involved in drought-inducibility
GhNOT2_3_5-8	3-AF1 binding site	TAAGAGAGGAA	1086	10	+	light responsive element
GhNOT2_3_5-8	TGACG-motif	TGACG	611	5	-	cis-acting regulatory element involved in the MeJA-responsiveness
GhNOT2_3_5-8	GATA-motif	AAGATAAGATT	111	10	-	part of a light responsive element
GhNOT2_3_5-8	LTR	CCGAAA	1324	6	-	cis-acting element involved in low-temperature responsiveness
GhNOT2_3_5-8	LTR	CCGAAA	1638	6	+	cis-acting element involved in low-temperature responsiveness
GhNOT2_3_5-8	G-Box	CACGTT	1772	6	-	cis-acting regulatory element involved in light responsiveness
GhNOT2_3_5-8	AE-box	AGAAACAA	2177	8	-	part of a module for light response
GhNOT2_3_5-8	G-box	CACGTC	609	6	+	cis-acting regulatory element involved in light responsiveness
GhNOT2_3_5-8	CGTCA-motif	CGTCA	611	5	+	cis-acting regulatory element involved in the MeJA-responsiveness
GhNOT2_3_5-8	ATCT-motif	AATCTAATCC	754	9	-	part of a conserved DNA module involved in light responsiveness
GhNOT2_3_5-8	ABRE	ACGTG	609	5	-	cis-acting element involved in the abscisic acid responsiveness
GhNOT2_3_5-8	ABRE	ACGTG	1773	5	+	auxin-responsive element
GhNOT2_3_5-8	TGA-element	AACGAC	96	6	-	part of a conserved DNA module involved in light responsiveness
GhNOT2_3_5-8	Box 4	ATTAAT	33	6	+	part of a conserved DNA module involved in light responsiveness
GhNOT2_3_5-8	Box 4	ATTAAT	463	6	+	part of a conserved DNA module involved in light responsiveness
GhNOT2_3_5-8	Box 4	ATTAAT	521	6	+	part of a conserved DNA module involved in light responsiveness
GhNOT2_3_5-8	Box 4	ATTAAT	1471	6	-	cis-acting element involved in salicylic acid responsiveness
GhNOT2_3_5-6	circadian	CAAAGATATC	1160	9	+	cis-acting regulatory element involved in circadian control
GhNOT2_3_5-6	P-box	CCTTTTG	281	7	+	gibberellin-responsive element
GhNOT2_3_5-6	P-box	CCTTTTG	736	7	+	gibberellin-responsive element
GhNOT2_3_5-6	MBS	CAACTG	510	6	+	MYB binding site involved in drought-inducibility
GhNOT2_3_5-6	TCA-element	CCATCTTTTT	609	9	+	cis-acting element involved in salicylic acid responsiveness
GhNOT2_3_5-6	ARE	AAACCA	1620	6	+	cis-acting regulatory element essential for the anaerobic induction
GhNOT2_3_5-6	MRE	AACCTAA	2036	7	-	MYB binding site involved in light responsiveness
GhNOT2_3_5-6	GT1-motif	GGTTAAT	2111	7	+	light responsive element
GhNOT2_3_5-6	GT1-motif	GGTTAA	2247	6	-	light responsive element
GhNOT2_3_5-6	O2-site	GATGATGTGG	203	9	-	cis-acting regulatory element involved in zein metabolism regulation
GhNOT2_3_5-6	Box 4	ATTAAT	567	6	+	part of a conserved DNA module involved in light responsiveness
GhNOT2_3_5-6	Box 4	ATTAAT	574	6	+	part of a conserved DNA module involved in light responsiveness
GhNOT2_3_5-6	Box 4	ATTAAT	2028	6	-	part of a conserved DNA module involved in light responsiveness
GhNOT2_3_5-6	LTR	CCGAAA	1175	6	+	cis-acting element involved in low-temperature responsiveness
GhNOT2_3_5-6	LTR	CCGAAA	1536	6	+	cis-acting element involved in low-temperature responsiveness
GhNOT2_3_5-6	TC-rich repeats	GTTTTCTTAC	2223	9	-	cis-acting element involved in defense and stress responsiveness
GhNOT2_3_5-6	TCT-motif	TCTTAC	308	6	-	part of a light responsive element
GhNOT2_3_5-6	TCT-motif	TCTTAC	353	6	-	part of a light responsive element
GhNOT2_3_5-6	TCT-motif	TCTTAC	559	6	-	part of a light responsive element
GhNOT2_3_5-7	TCA-element	CCATCTTTTT	1701	9	-	cis-acting element involved in salicylic acid responsiveness
GhNOT2_3_5-7	ARE	AAACCA	603	6	+	cis-acting regulatory element essential for the anaerobic induction
GhNOT2_3_5-7	ARE	AAACCA	1031	6	-	cis-acting regulatory element essential for the anaerobic induction
GhNOT2_3_5-7	GT1-motif	GGTTAA	2288	6	+	light responsive element
GhNOT2_3_5-7	TATC-box	TATCCCA	1799	7	-	cis-acting element involved in gibberellin-responsiveness
GhNOT2_3_5-7	CAT-box	GCCACT	1332	6	+	cis-acting regulatory element related to meristem expression
GhNOT2_3_5-7	TCCC-motif	TCTCCCT	1098	7	+	part of a light responsive element
GhNOT2_3_5-7	chs-CMA2a	TCACTTGA	2361	8	+	part of a light responsive element
GhNOT2_3_5-7	circadian	CAAAGATATC	2346	10	+	cis-acting regulatory element involved in circadian control
GhNOT2_3_5-7	P-box	CCTTTTG	1014	7	+	gibberellin-responsive element
GhNOT2_3_5-7	TCT-motif	TCTTAC	1830	6	-	part of a light responsive element
GhNOT2_3_5-7	GATA-motif	AAGGATAAGG	1433	9	-	part of a light responsive element
GhNOT2_3_5-7	TGA-element	AACGAC	525	6	+	auxin-responsive element
GhNOT2_3_5-7	Box 4	ATTAAT	180	6	+	part of a conserved DNA module involved in light responsiveness
GhNOT2_3_5-7	Box 4	ATTAAT	184	6	+	part of a conserved DNA module involved in light responsiveness
GhNOT2_3_5-7	Box 4	ATTAAT	188	6	+	part of a conserved DNA module involved in light responsiveness
GhNOT2_3_5-7	Box 4	ATTAAT	1462	6	-	part of a conserved DNA module involved in light responsiveness
GhNOT2_3_5-7	Box 4	ATTAAT	1658	6	-	part of a conserved DNA module involved in light responsiveness
GhNOT2_3_5-7	Box 4	ATTAAT	1790	6	-	part of a conserved DNA module involved in light responsiveness
GhNOT2_3_5-7	Box 4	ATTAAT	1899	6	-	part of a conserved DNA module involved in light responsiveness
GhNOT2_3_5-7	LTR	CCGAAA	866	6	-	cis-acting element involved in low-temperature responsiveness
GhNOT2_3_5-7	LTR	CCGAAA	1135	6	+	cis-acting element involved in low-temperature responsiveness
GhNOT2_3_5-7	chs-CMA1a	TTACTTAA	1603	8	-	part of a light responsive element

## Sheet: Table S5
Table S5 Primer sequences used in the study
Name	Primer sequence(5’-3’)	application
qFGhNOT2_3_5-1/10	ACAGAACAGTGGGCCACCTGGGATT	qRT-PCR
qRGhNOT2_3_5-1/10	AACCAAGTAAACCAAAAGGGTCAGA	qRT-PCR
qFGhNOT2_3_5-2/6	GATGAAAGACCTGGGAACAGTAGCA	qRT-PCR
qRGhNOT2_3_5-2/6	CAGGTATTCCAGCAGATTCACTA	qRT-PCR
qFGhNOT2_3_5-3/7	ATCTTTGGCAGCATCAATGTC	qRT-PCR
qRGhNOT2_3_5-3/7	AGATTCAGTGGAGCAGGGGTTACAT	qRT-PCR
qFGhNOT2_3_5-4/8	CGGGTGGAGGATTATCCGTGCCT	qRT-PCR
qRGhNOT2_3_5-4/8	TGGGAAAGGGGACCACCAGCAGATG	qRT-PCR
qFGhNOT2_3_5-5/9	TGTAGGAAACCCTGGATTTAGTAGT	qRT-PCR
qRGhNOT2_3_5-5/9	CAGGCACAGATAACCCTCCACC	qRT-PCR
qFGbNOT2_3_5-5/10	TCGCCTCAAATAATCTCCCT	qRT-PCR
qRGbNOT2_3_5-5/10	TTCCTACAACACTAATACCTCCTCTA	qRT-PCR
qFGbNOT2_3_5-2/7	TGGTGGAGGGTTATCTGTGC	qRT-PCR
qRGbNOT2_3_5-2/7	GACGACTTGTCAACTGAGGGA	qRT-PCR
qFGbNOT2_3_5-3/8	CCCTTACAATCTAACCAGTCTTCT	qRT-PCR
qRGbNOT2_3_5-3/8	CCTCCAGTATTCATTGAGCCAC	qRT-PCR
qFGbNOT2_3_5-1/6	TATTCATCTCATCGCCCACA	qRT-PCR
qRGbNOT2_3_5-1/6	ATCATAACCCATACCAGAAACC	qRT-PCR
qFGbNOT2_3_5-4/9	CCCAACCTAAAGACTCAGAACG	qRT-PCR
qRGbNOT2_3_5-4/9	TGTATCAGTGCCAGTGCCATAT	qRT-PCR
VFGbNOT2_3_5-3/8	ggcctcgagacgcgtgagctcATGGGAGCGAGTCGCAAGC	VIGS vector construction
VRGbNOT2_3_5-3/8	agaaggcctccatggggatccTCAGCAAATAAGTTCATCTTCAAGATAG	VIGS vector construction
VFGbNOT2_3_5-4/9	ggcctcgagacgcgtgagctcATGGGAGCGAGTCGCAAGC	VIGS vector construction
VRGbNOT2_3_5-4/9	agaaggcctccatggggatccCTATACTATAAGTTCATCTTCCAGATAGTTATACTC	VIGS vector construction
